# Supplementary material for: Reassortment of Human Rotavirus Gene Segments into G11 Rotavirus Strains
Source: PubMed Central journal article supplement (PMC3321964; doi:10.3201/eid1604.091591), 2010-04
Supplement: 09-1591-Techapp1.pdf [file 09-1591-Techapp1.pdf]

# Reassortment of G11 Rotavirus Strains in Humans

Table 1. GenBank accession numbers of rotavirus gene segments sequenced in the present study\*

| Gene | Dhaka6          | Dhaka22-01 | Matlab36-02 | KTM368   | YM              | OSU             | Gottfried     |
|------|-----------------|------------|-------------|----------|-----------------|-----------------|---------------|
| VP1  | EF560705        | GU199478   | GU199503    | GU199492 | <b>X76486</b>   | GU199514        | <b>M32805</b> |
| VP2  | GU199519        | GU199479   | GU199504    | GU199493 | GU199516        | GU199515        | GU199487      |
| VP3  | EF560706        | GU199480   | GU199505    | GU199494 | <b>AY300922</b> | <b>AY277921</b> | GU199488      |
| VP4  | GU199520        | DQ482725   | GU199506    | GU199495 | <b>M63231</b>   | <b>X13190</b>   | <b>M33516</b> |
| VP6  | GU199521        | GU199481   | GU199507    | GU199496 | <b>X69487</b>   | <b>AF317123</b> | <b>D00326</b> |
| VP7  | <b>AY773003</b> | DQ482712   | GU199508    | GU199497 | <b>M23194</b>   | <b>X04613</b>   | <b>X06386</b> |
| NSP1 | GU199522        | GU199482   | GU199509    | GU199498 | <b>D38154</b>   | <b>Z12107</b>   | <b>U08431</b> |
| NSP2 | EF560709        | GU199483   | GU199510    | GU199499 | GU199517        | <b>X06722</b>   | GU199489      |
| NSP3 | GU199523        | GU199484   | GU199511    | GU199500 | GU199518        | <b>X81431</b>   | <b>X81430</b> |
| NSP4 | EF560711        | GU199485   | GU199512    | GU199501 | <b>X69485</b>   | <b>D88831</b>   | GU199490      |
| NSP5 | EF560712        | GU199486   | GU199513    | GU199502 | <b>X69486</b>   | <b>X15519</b>   | GU199491      |

\*VP, structural protein; NSP, nonstructural protein. Numbers in **boldface** are accession numbers are from previous studies.

Table 2. Pairwise identities between partial nucleotide gene sequences of G11P[8] rotavirus strain Dhaka22-01 and other human G11 rotavirus strains (Matlab36-02, Dhaka6, and KTM368), human strains Dhaka16-03 (G1P[8]) and Dhaka12-03 (G12P[6]), and Belgian strain B4633-03 (G12P[8])\*

| Gene and strain | Strains    |             |        |        |          |            |            |
|-----------------|------------|-------------|--------|--------|----------|------------|------------|
|                 | Dhaka22_01 | Matlab36-02 | Dhaka6 | KTM368 | B4633-03 | Dhaka12-03 | Dhaka16-03 |
| VP1             |            |             |        |        |          |            |            |
| Dhaka22_01      |            |             |        |        |          |            |            |
| Matlab36-02     | 97.1       |             |        |        |          |            |            |
| Dhaka6          | 97.1       | 96.3        |        |        |          |            |            |
| KTM368          | 86.6       | 87.2        | 86.4   |        |          |            |            |
| B4633-03        | 97.9       | 97.6        | 98.7   | 86.1   |          |            |            |
| Dhaka12-03      | 100        | 97.1        | 97.1   | 86.6   | 97.9     |            |            |
| Dhaka16-03      | 97.1       | 96.9        | 97.9   | 85.9   | 99.2     | 97.1       |            |
| Wa              | 94.2       | 94          | 93.5   | 88.7   | 94.2     | 94.2       | 94         |
| VP2             |            |             |        |        |          |            |            |

|             |      |      |      |      |      |      |    |
|-------------|------|------|------|------|------|------|----|
| Dhaka22_01  |      |      |      |      |      |      |    |
| Matlab36-02 | 93.5 |      |      |      |      |      |    |
| Dhaka6      | 93.5 | 100  |      |      |      |      |    |
| KTM368      | 93.3 | 99.4 | 99.4 |      |      |      |    |
| B4633-03    | 95.1 | 94.6 | 94.6 | 94.4 |      |      |    |
| Dhaka12-03  | 98.9 | 93.8 | 93.8 | 93.5 | 94.8 |      |    |
| Dhaka16-03  | 98.7 | 93.5 | 93.5 | 93.3 | 95.1 | 98.5 |    |
| Wa          | 91.4 | 92.7 | 92.7 | 92   | 91.6 | 91.2 | 91 |
| VP3         |      |      |      |      |      |      |    |

|             |      |      |      |      |      |      |      |
|-------------|------|------|------|------|------|------|------|
| Dhaka22_01  |      |      |      |      |      |      |      |
| Matlab36-02 | 86.3 |      |      |      |      |      |      |
| Dhaka6      | 86.3 | 99.6 |      |      |      |      |      |
| KTM368      | 86.7 | 99.2 | 98.8 |      |      |      |      |
| B4633-03    | 99   | 85.7 | 85.7 | 86.1 |      |      |      |
| Dhaka12-03  | 99.6 | 86.3 | 86.3 | 86.7 | 99   |      |      |
| Dhaka16-03  | 94.8 | 86.7 | 86.7 | 87.5 | 93.8 | 94.4 |      |
| Wa          | 92.9 | 85.2 | 85.2 | 85.9 | 92.7 | 92.9 | 92.3 |

|             |      |      |      |      |      |      |      |
|-------------|------|------|------|------|------|------|------|
| VP4         |      |      |      |      |      |      |      |
| Dhaka22_01  |      |      |      |      |      |      |      |
| Matlab36-02 | 98.4 |      |      |      |      |      |      |
| Dhaka6      | 58.5 | 58.4 |      |      |      |      |      |
| KTM368      | 58.4 | 58.3 | 99.5 |      |      |      |      |
| B4633-03    | 98   | 99.4 | 58.4 | 58.3 |      |      |      |
| Dhaka12-03  | 72.5 | 72.3 | 60.1 | 60   | 72.1 |      |      |
| Dhaka16-03  | 97.9 | 99.5 | 58.5 | 58.4 | 98.9 | 72.3 |      |
| Wa          | 91.5 | 91.6 | 58.8 | 58.6 | 91.5 | 72.1 | 91.2 |
| VP6         |      |      |      |      |      |      |      |

|             |      |      |      |      |      |      |      |
|-------------|------|------|------|------|------|------|------|
| Dhaka22_01  |      |      |      |      |      |      |      |
| Matlab36-02 | 99   |      |      |      |      |      |      |
| Dhaka6      | 99.2 | 99.3 |      |      |      |      |      |
| KTM368      | 83.9 | 84.3 | 84.2 |      |      |      |      |
| B4633-03    | 97.5 | 97.1 | 97.2 | 84.2 |      |      |      |
| Dhaka12-03  | 98   | 98.2 | 98.3 | 84.2 | 97.1 |      |      |
| Dhaka16-03  | 98.3 | 98.2 | 98.3 | 83.9 | 97.3 | 99.4 |      |
| Wa          | 90.5 | 90.5 | 90.3 | 83.5 | 91.2 | 90.2 | 90.2 |
| VP7         |      |      |      |      |      |      |      |

|             |      |      |      |      |      |      |      |
|-------------|------|------|------|------|------|------|------|
| Dhaka22_01  |      |      |      |      |      |      |      |
| Matlab36-02 | 99.8 |      |      |      |      |      |      |
| Dhaka6      | 99.5 | 99.7 |      |      |      |      |      |
| KTM368      | 99.7 | 99.5 | 99.8 |      |      |      |      |
| B4633-03    | 72.7 | 72.5 | 72.8 | 73   |      |      |      |
| Dhaka12-03  | 72.7 | 72.5 | 72.8 | 73   | 97.7 |      |      |
| Dhaka16-03  | 70.5 | 70.4 | 70.7 | 70.8 | 70.8 | 70.2 |      |
| Wa          | 70.2 | 70.4 | 70.7 | 70.5 | 70.4 | 70.2 | 91.1 |
| NSP1        |      |      |      |      |      |      |      |

|             |      |  |  |  |  |  |  |
|-------------|------|--|--|--|--|--|--|
| Dhaka22_01  |      |  |  |  |  |  |  |
| Matlab36-02 | 98.3 |  |  |  |  |  |  |

|            |      |      |      |      |      |      |      |
|------------|------|------|------|------|------|------|------|
| Dhaka6     | 97.9 | 99.2 |      |      |      |      |      |
| KTM368     | 99   | 98.6 | 98.2 |      |      |      |      |
| B4633-03   | 97.1 | 98   | 97.8 | 97.4 |      |      |      |
| Dhaka12-03 | 99.1 | 99   | 98.6 | 99.3 | 97.8 |      |      |
| Dhaka16-03 | 97.9 | 99.6 | 98.8 | 98.2 | 97.7 | 98.6 |      |
| Wa         | 85.5 | 85.7 | 85.5 | 85.3 | 85.3 | 85.7 | 86.1 |
| NSP2       |      |      |      |      |      |      |      |

|             |      |      |      |      |      |      |      |
|-------------|------|------|------|------|------|------|------|
| Dhaka22_01  |      |      |      |      |      |      |      |
| Matlab36-02 | 99   |      |      |      |      |      |      |
| Dhaka6      | 98.8 | 99.6 |      |      |      |      |      |
| KTM368      | 88.1 | 88.1 | 88   |      |      |      |      |
| B4633-03    | 98.3 | 98.6 | 98.4 | 87.2 |      |      |      |
| Dhaka12-03  | 96.7 | 97.3 | 97.1 | 87.4 | 97.4 |      |      |
| Dhaka16-03  | 98.8 | 99.6 | 99.5 | 88   | 98.4 | 97.4 |      |
| Wa          | 93.6 | 93.5 | 93.1 | 87.4 | 93.6 | 92.8 | 93.3 |
| NSP3        |      |      |      |      |      |      |      |

|             |      |      |      |      |      |      |      |
|-------------|------|------|------|------|------|------|------|
| Dhaka22_01  |      |      |      |      |      |      |      |
| Matlab36-02 | 97.6 |      |      |      |      |      |      |
| Dhaka6      | 97.7 | 99.3 |      |      |      |      |      |
| KTM368      | 92.5 | 92.5 | 92.9 |      |      |      |      |
| B4633-03    | 98.8 | 98   | 98.1 | 93.2 |      |      |      |
| Dhaka12-03  | 99.3 | 98   | 98.1 | 92.9 | 99.2 |      |      |
| Dhaka16-03  | 98   | 99.6 | 99.5 | 92.6 | 98.1 | 98.4 |      |
| Wa          | 95.6 | 95.1 | 95.2 | 92.8 | 96   | 96   | 95.2 |
| NSP4        |      |      |      |      |      |      |      |

|             |      |      |      |      |      |      |    |
|-------------|------|------|------|------|------|------|----|
| Dhaka22_01  |      |      |      |      |      |      |    |
| Matlab36-02 | 100  |      |      |      |      |      |    |
| Dhaka6      | 99   | 99   |      |      |      |      |    |
| KTM368      | 87.8 | 87.8 | 87.8 |      |      |      |    |
| B4633-03    | 99   | 99   | 97.9 | 88.2 |      |      |    |
| Dhaka12-03  | 98.3 | 98.3 | 97.3 | 87.7 | 97.9 |      |    |
| Dhaka16-03  | 99.3 | 99.3 | 99.3 | 87.5 | 98.3 | 97.6 |    |
| Wa          | 93.7 | 93.7 | 93   | 89   | 93   | 92.8 | 93 |
| NSP5        |      |      |      |      |      |      |    |

|             |      |      |      |      |  |  |  |
|-------------|------|------|------|------|--|--|--|
| Dhaka22_01  |      |      |      |      |  |  |  |
| Matlab36-02 | 99.5 |      |      |      |  |  |  |
| Dhaka6      | 98.6 | 98.1 |      |      |  |  |  |
| KTM368      | 94.5 | 94   | 95.6 |      |  |  |  |
| B4633-03    | 98.6 | 98.4 | 98.6 | 94.9 |  |  |  |

|            |      |      |      |      |      |      |      |
|------------|------|------|------|------|------|------|------|
| Dhaka12-03 | 99.1 | 98.6 | 99.1 | 95.4 | 98.8 |      |      |
| Dhaka16-03 | 99.3 | 99.8 | 97.9 | 93.8 | 98.2 | 98.4 |      |
| Wa         | 92.8 | 92.3 | 93.1 | 92.4 | 92.4 | 93.3 | 92.3 |

\*Values are percentages. VP, structural protein; NSP, nonstructural protein. The following nucleotide regions were used for comparisons: VP1: 26-224; VP2: 27-490; VP3: 303-797; VP4: 41-842; VP6: 42-755; VP7: 49-1010; NSP1: 19-737; NSP2: 41-770; NSP3: 35-771; NSP4: 62-732; NSP5: 38-645.
